# Supplementary material for: Incorporating a silicon unit into a polyether backbone—an effective approach to enhance polyether solubility in CO2
Source: Royal Society of Chemistry journal article supplement (doi:10.1039/c7ra01587a), 2017-01-01
Supplement: c7ra01587a1.pdf [file c7ra01587a1.pdf]

1

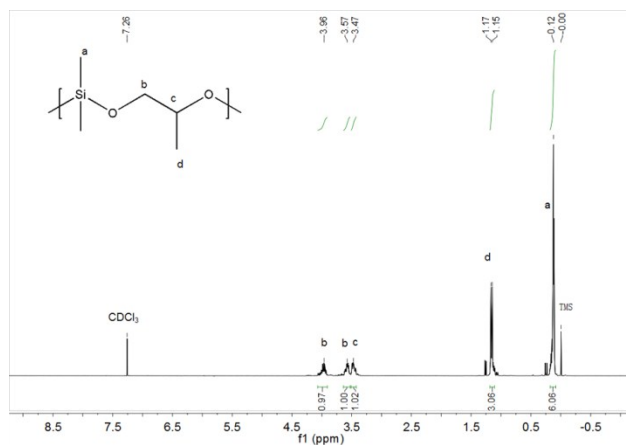

2

3 **Fig. S2** <sup>1</sup>H NMR of PSPG. The chemical shift of H atom in δ = 0.12 ppm is belong to the  
4 methyl (CH<sub>3</sub>) group linked to Si atom, 1.15 and 1.17 ppm are belong to the methyl (CH<sub>3</sub>)  
5 group linked to C atom, and δ = 3.47~3.96 ppm are belong to the methane and methyne  
6 group.

7

1

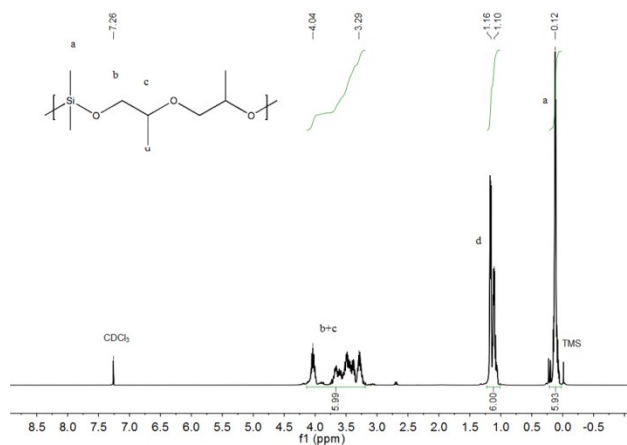

2

3 **Fig. S3** <sup>1</sup>H NMR of PSDPG. The chemical shift of H atom in  $\delta = 0.12$  ppm is belong to the  
4 methyl (CH<sub>3</sub>) group linked to Si atom,  $\delta = 1.10$  and 1.16 ppm are belong to the methyl  
5 (CH<sub>3</sub>) group linked to C atom, and  $\delta = 3.29\sim 4.04$  ppm are belong to the methylene and  
6 methyne group.

7

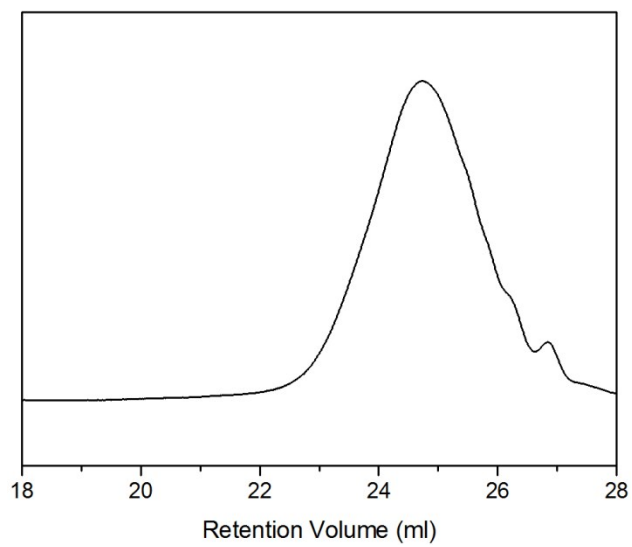

1  
2  
3

**Fig. S4** GPC spectrum of PDSDEG.

1

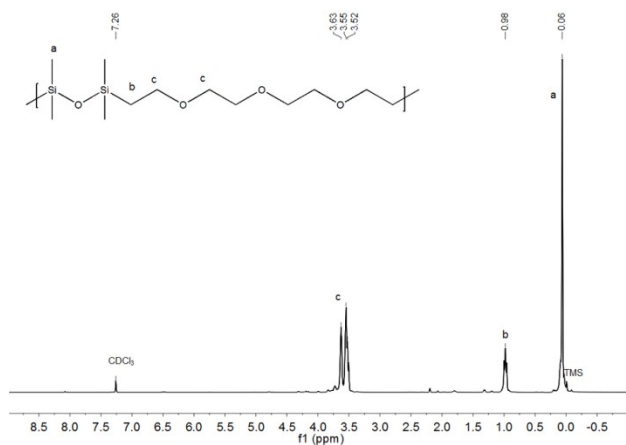

2

3 **Fig. S5** <sup>1</sup>H NMR of PDSDEG. The chemical shift of H atom in δ = 0.06 ppm is belong to  
4 the methyl (CH<sub>3</sub>) group linked to Si atom, δ = 0.98 ppm is belong to the methylene (CH<sub>2</sub>)  
5 group linked to Si atom, and δ = 3.52~3.63 ppm are belong to the methylene linked to  
6 oxygen atom.

7

1 Reference

2 1 M. Padmanaban, M. A. Kakimoto and Y. IMAI, *Journal of Polymer Science: Part A*  
3 *Polymer Chemistry*, 1990, **28**, 2997-3005.

4
